# Supplementary material for: Graphene oxide–TiO2 composite as a novel adsorbent for the preconcentration of heavy metals and rare earth elements in environmental samples followed by on-line inductively coupled plasma optical emission spectrometry detection
Source: Royal Society of Chemistry journal article supplement (doi:10.1039/c4ra13333a), 2014-12-15
Supplement: c4ra13333a1.pdf [file c4ra13333a1.pdf]

# Graphene Oxide-TiO<sub>2</sub> composite as a novel adsorbent for the preconcentration of heavy metals and rare earth elements in environmental samples followed by on-line inductively coupled plasma optical emission spectrometry detection

Yanan Zhang, Cheng Zhong, Qiangying Zhang, Beibei Chen, Man He\*, Bin Hu

Key Laboratory of Analytical Chemistry for Biology and Medicine (Ministry of Education),  
Department of Chemistry, Wuhan University, Wuhan 430072, China

## Supplementary Information

**Fig. S1.** FT-IR spectra of GO (A), TiO<sub>2</sub> (B) and GO-TiO<sub>2</sub> (1:1) (C).

**Fig. S2.** TGA of GO (A) and GO-TiO<sub>2</sub> (1:1) composite (B); DTG of GO (C) and GO-TiO<sub>2</sub> (1:1) composite (D).

**Fig. S3.** XRD pattern of GO (A), TiO<sub>2</sub> (B) and GO-TiO<sub>2</sub> (1:1) composite (C).

**Fig. S4.** Effect of 1 mol L<sup>-1</sup> HNO<sub>3</sub> volume on the recovery of the analytes. pH: 5; The concentration of the metal ions: 0.5 μg mL<sup>-1</sup>; Sample volume: 2.5 mL; Flow rate: 0.5 mL min<sup>-1</sup>

**Fig. S5.** Effect of elution flow rate on recovery of the analytes. pH: 5; The concentration of the metal ions: 0.5 μg mL<sup>-1</sup>; Sample volume: 2.5 mL; Sample flow rate: 0.5 mL min<sup>-1</sup>; Eluent concentration: 1 mol L<sup>-1</sup> HNO<sub>3</sub>; Eluent volume: 0.7 mL

**Fig. S6.** Effect of sample volume on recovery of the analytes. pH: 5; The absolute concentration of each metal ion: 1.25 μg; Sample flow rate: 2.0 mL min<sup>-1</sup>

**Fig. S7.** Breakthrough curves of GO-TiO<sub>2</sub> (1:1) of the analytes. (10 μg mL<sup>-1</sup> at a sample flow rate of 2.0 mL min<sup>-1</sup>)

**Table S1.** Comparison of adsorption capacities (mg g<sup>-1</sup>) with those reported in the literature

**Table S2.** Correlation coefficient values of the Pseudo-first-order and Pseudo-second-order

**Table S3.** Comparison of the method with those reported in the literature (on-line SPE-ICP-OES)

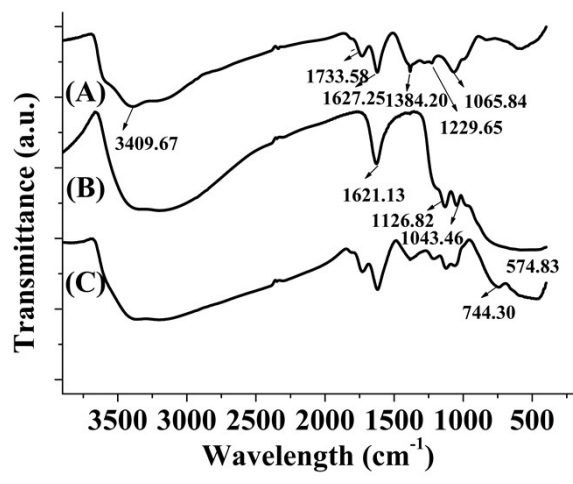

Fig. S1.

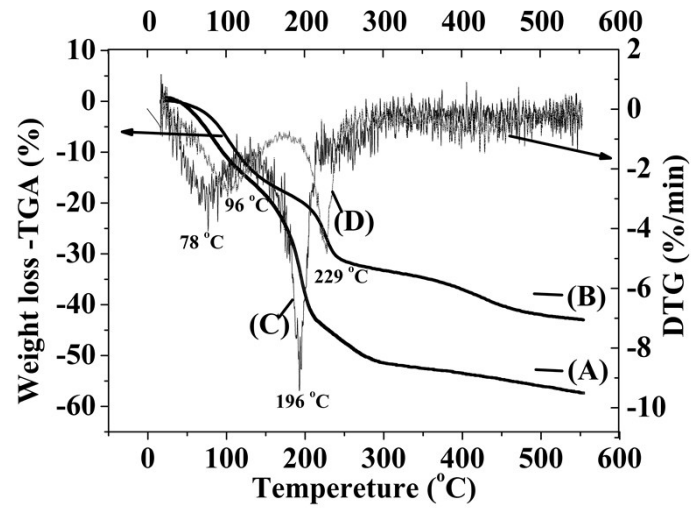

Fig. S2.

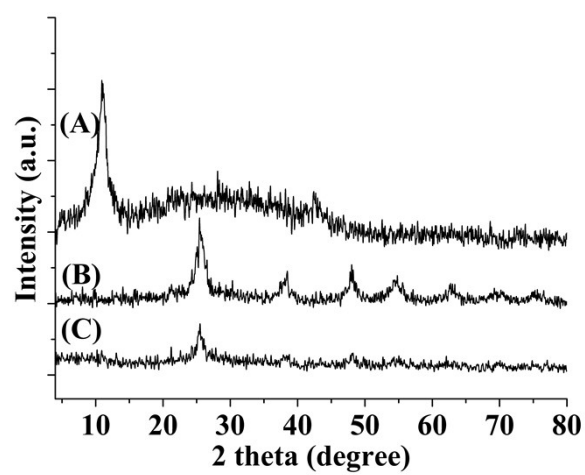

Fig. S3.

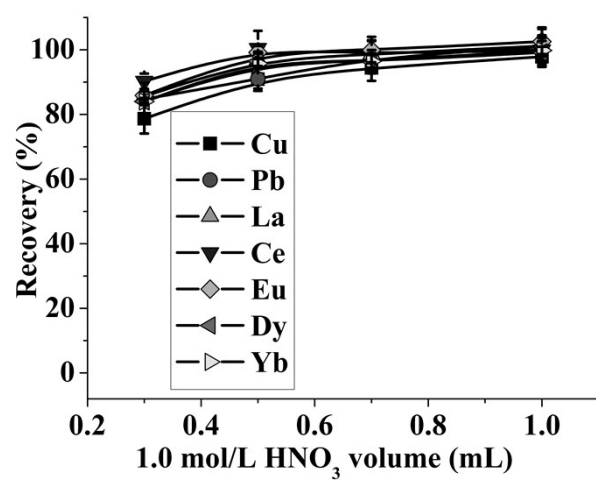

Fig. S4.

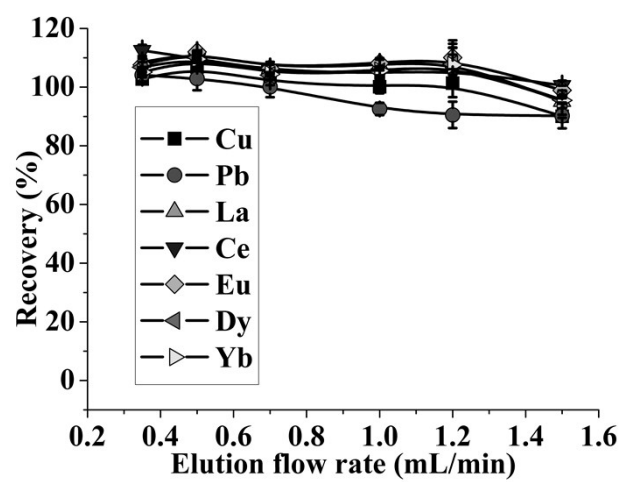

Fig. S5.

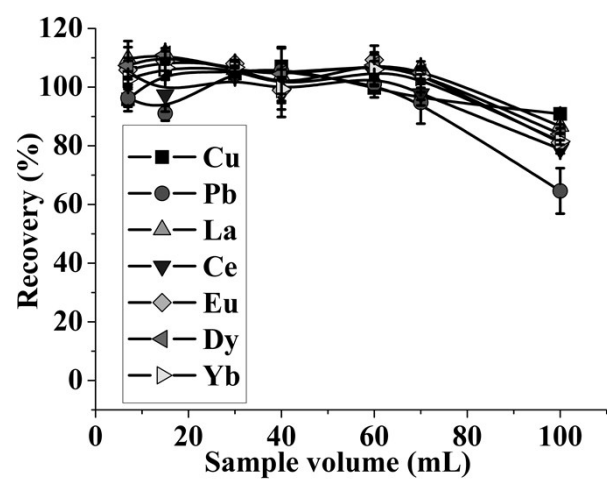

Fig. S6.

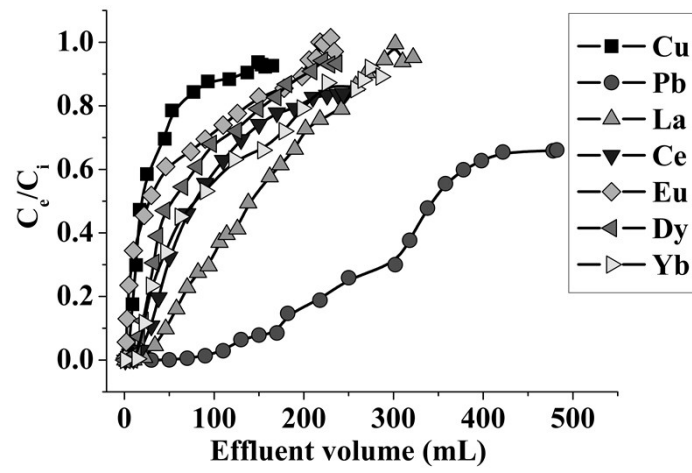

Fig. S7.



**Table S1.**

| Materials                            | Cu   | Pb   | La   | Ce   | Eu   | Dy   | Yb   | Ref.      |
|--------------------------------------|------|------|------|------|------|------|------|-----------|
| nanometer-sized TiO <sub>2</sub>     | —    | —    | 7.0  | —    | 8.3  | 8.8  | 9.8  | 13        |
| modified mesoporous TiO <sub>2</sub> | 11.7 | 17.7 | —    | —    | —    | —    | —    | 11        |
| mesoporous TiO <sub>2</sub>          | 8.1  | —    | 21.3 | 13.8 | 19.5 | 16.7 | 26.5 | 12        |
| PAN-modified nano-TiO <sub>2</sub>   | 4.73 | —    | —    | —    | —    | —    | 6.14 | 15        |
| Graphene (dithizone)                 | —    | 16.6 | —    | —    | —    | —    | —    | 21        |
| MWNTs                                | —    | —    | 8.30 | —    | 9.43 | —    | 8.57 | 19        |
| MWCNT-PPy                            | —    | 25   | —    | —    | —    | —    | —    | 20        |
| TiO <sub>2</sub> Nanotubes           | —    | —    | 12.3 | 10.1 | 13.2 | —    | 14.7 | 37        |
| oxidized SWNTs                       | 5.4  | 6.2  | —    | —    | —    | —    | —    | 18        |
| GO@SiO <sub>2</sub>                  | 6.0  | 13.6 | —    | —    | —    | —    | —    | 33        |
| GO-TiO <sub>2</sub>                  | 8.2  | 64.2 | 28.7 | 25.1 | 16.6 | 19.3 | 24.1 | This work |

**Table S2.**

| Analyte | Pseudo-first-order |         |         | Pseudo-second-order |         |         |
|---------|--------------------|---------|---------|---------------------|---------|---------|
|         | $R_A^2$            | $R_C^2$ | $R_E^2$ | $R_B^2$             | $R_D^2$ | $R_F^2$ |
| Cu      | 0.892              | 0.999   | 0.937   | 0.996               | 0.991   | 0.999   |
| Pb      | 0.802              | 0.988   | 0.839   | 0.907               | 0.860   | 0.994   |
| La      | 0.832              | 0.998   | 0.815   | 0.984               | 0.935   | 0.999   |
| Ce      | 0.785              | 1.000   | 0.761   | 0.994               | 0.968   | 0.999   |
| Eu      | 0.772              | 0.999   | 0.820   | 0.971               | 0.964   | 0.990   |
| Dy      | 0.831              | 0.997   | 0.856   | 0.981               | 0.977   | 0.997   |
| Yb      | 0.876              | 0.999   | 0.841   | 0.998               | 0.995   | 0.996   |

**Table S3.**

| Materials                            | Sample throughput (h <sup>-1</sup> ) | Enrichment factor | LODs (ng mL <sup>-1</sup> ) |      |      |      |      |      |      | Ref.      |
|--------------------------------------|--------------------------------------|-------------------|-----------------------------|------|------|------|------|------|------|-----------|
|                                      |                                      |                   | Cu                          | Pb   | La   | Ce   | Eu   | Dy   | Yb   |           |
| nanometer-sized TiO <sub>2</sub>     | —                                    | 50                | —                           | —    | 0.36 | —    | 0.12 | 0.28 | 0.10 | 13        |
| nanometer-sized TiO <sub>2</sub>     | —                                    | 50                | 0.34                        | —    | —    | —    | —    | —    | —    | 14        |
| modified mesoporous TiO <sub>2</sub> | 10                                   | 20                | 0.23                        | 0.50 | —    | —    | —    | —    | —    | 11        |
| mesoporous TiO <sub>2</sub>          | 20                                   | 10                | 0.12                        | —    | 0.16 | 0.35 | 0.07 | 0.10 | 0.03 | 12        |
| PAN-modified nano-TiO <sub>2</sub>   | —                                    | 5                 | 2.8                         | —    | —    | —    | —    | —    | 0.6  | 15        |
| activated carbon                     | 29                                   | 30                | 0.1                         | —    | —    | —    | —    | —    | —    | 48        |
| GO-TiO <sub>2</sub>                  | 12                                   | 10                | 0.48                        | 2.64 | 0.41 | 0.24 | 0.13 | 0.26 | 0.21 | This work |
